# Supplementary material for: Pressure control of diastereodifferentiating [2 + 2] photocycloaddition of (E)-stilbene to chiral fumarate upon direct and charge-transfer excitationElectronic supplementary information (ESI) available: pressure effect on the product ratio 4/3. See http://www.rsc.org/suppdata/cc/b4/b404555f/
Source: Royal Society of Chemistry journal article supplement (doi:10.1039/b404555f), 2004-01-01
Supplement: b404555f.pdf [file b404555f.pdf]

**Supporting Information**  
**For**  
**Pressure control of diastereodifferentiating [2+2]**  
**photocycloaddition of (*E*)-stilbene to chiral fumarate upon**  
**direct and charge-transfer excitation**

Hideaki Saito,<sup>a</sup> Tadashi Mori,<sup>\*a</sup> Takehiko Wada<sup>a</sup> and Yoshihisa Inoue<sup>\*ab</sup>

<sup>a</sup> Department of Molecular Chemistry, Graduate School of Engineering, Osaka University, 2-1 Yamada-oka, Suita 565-0871, Japan. E-mail: tmori@chem.eng.osaka-u.ac.jp.

<sup>b</sup> Entropy Control Project, ICORP, JST, 4-6-3 Kamishinden, Toyonaka 560-0085, Japan.

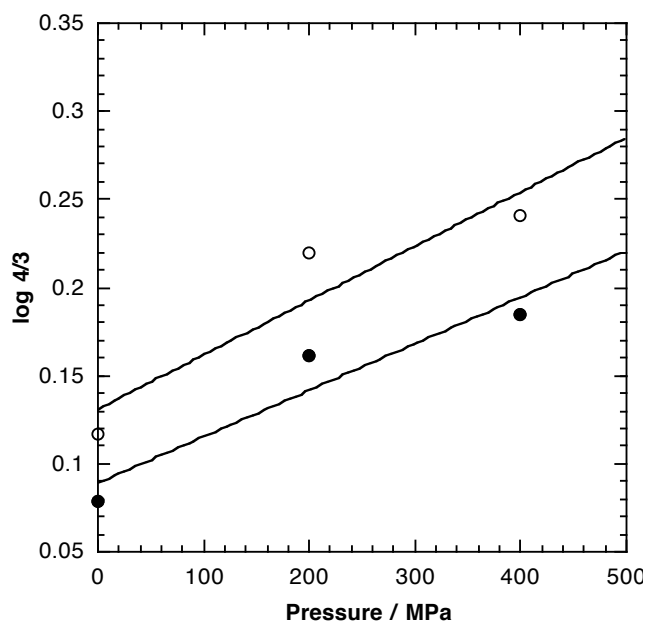

**Figure S1** Pressure effect on the product ratio **4/3** in direct (●) and CT (○) excitation.
